# Supplementary material
Source: PubMed Central journal article supplement (PMC1850952)

## Supplemental Figure 1

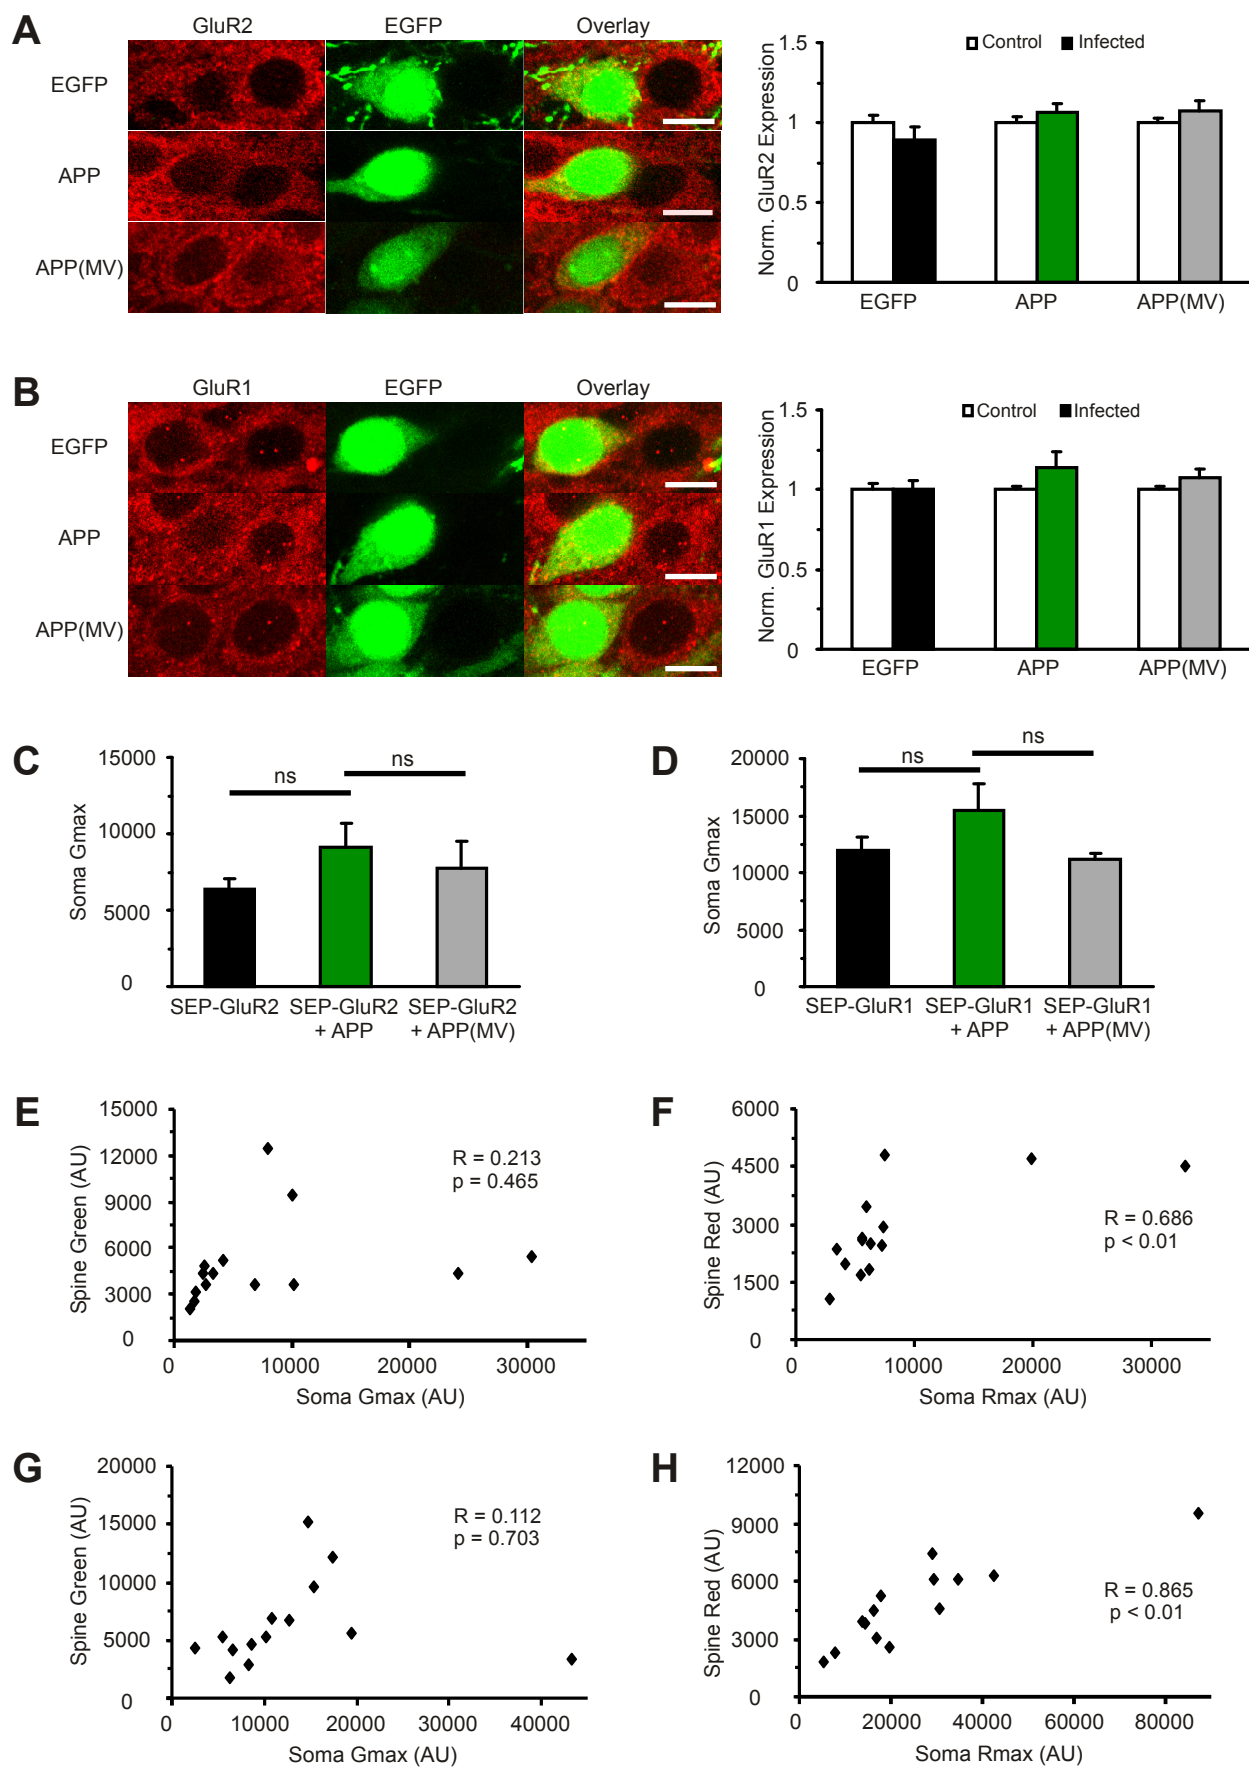

## Supplemental Figure 2

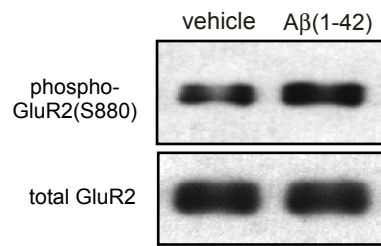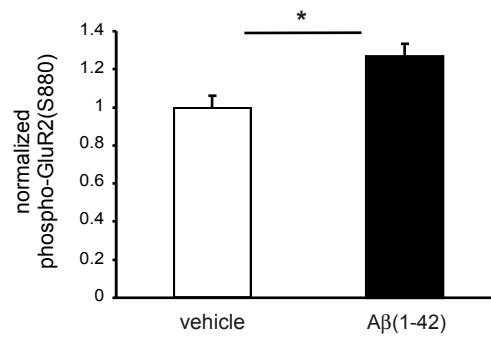

Supplement: NIHMS14785-supplement-01.pdf [file NIHMS14785-supplement-01.pdf]
